# Supplementary material
Source: ML conference proceedings conference paper supplement (https://proceedings.neurips.cc/paper_files/paper/2009/hash/4f16c818875d9fcb6867c7bdc89be7eb-Abstract.html)
Supplement: Supplementary file 1 [file 4f16c818875d9fcb6867c7bdc89be7eb-Supplemental.zip]

## A Appendix to “Streaming $k$ -means approximation,” N. Ailon, R. Jaiswal, and C. Monteleoni, NIPS 2009.

### A.1 Future work

Kanungo *et al.* [KMNP+04] state that a local search heuristic results in a constant factor approximation for  $k$ -means, with a polynomial running time. The paper is not self contained with respect to running time analysis, and various key ideas required for completing it appear in [AGKM+04] and [CG99]. Arthur and Vassilvitskii [AV07] report that Kanungo *et al.*'s local search algorithm gives an approximation factor of  $O(9 + \epsilon)$  in time  $O(n^3/\epsilon^d)$ , where  $d$  is the dimensionality of the data<sup>11</sup>. We do not know what range of  $\epsilon$  this claim assumes, and what the running time for some fixed  $\epsilon$  (say, 1) would be. The local search algorithm can be readily plugged into our multi-level algorithm in Section 3.3. Our analysis does highlight, however, the importance of reducing the approximation constants in each invocation of a batch algorithm on memory blocks, because the final approximation constants are exponential in these constants (the power being  $\log n / \log M$ ). Also, it is important to control the polynomial degree of the running time dependence of each invocation. Indeed, assume we can afford a streaming running time of at most  $C \times n$  for some constant  $C > 0$ . If we are using a batch algorithm of running time  $C' \times N^p$  on each size- $N$  block for some  $C' > 0$ , then the maximal block size we can afford will be  $\sim (C/C')^{1/p}$ . The higher  $p$  is, however, the larger the resulting hierarchy depth  $r$ , and the worse the final approximation will be. The running time efficiency was, in fact, one of the main motivations for our derivation of  $k$ -means# for the purpose of obtaining a constant factor bi-criteria algorithm for  $k$ -means. We leave the analysis of plugging in different batch algorithms to our hierarchical solution for streaming  $k$ -means to future work.

### A.2 Proof of Theorem 3.1

*Proof.* As mentioned in Section 3.1, the  $a'$  approximation of the number of centers is a direct consequence of the algorithm, so it remains to bound the approximation of the  $k$ -means objective.

Recall that the  $k$ -means cost of a set of centers  $T$ , with respect to a point set  $S \subset \mathbb{R}^d$ , is defined as  $\text{cost}(T) = \sum_{x \in S} w(x) \cdot D(x, T)^2$ , where  $w(x)$  denotes the weight associated with the point  $x$ .<sup>12</sup> We will denote the optimal clustering by  $T^* = \{t_1^*, t_2^*, \dots, t_k^*\}$ . Thus  $T^* = \arg \min_{T \subset \mathbb{R}^d : |T|=k} \text{cost}(T)$ . For a given set of cluster “centers”  $T$ , we will use the notation  $t(x)$  to denote the element of  $T$  closest to  $x$ .

We will make use of the following lemmas, which extend the lemmas in [GMMM+03] (using the exposition of Dasgupta’s lecture notes [Das08]), to the case of the  $k$ -means objective.

**Lemma A.1.**  $\text{cost}(S, T) \leq 2 \sum_{i=1}^{\ell} \text{cost}(S_i, T_i) + 2 \text{cost}(S_w, T)$

*Proof.* We start by rewriting the  $k$ -means cost by separating it into the sum over each part (in the partition made by the first step of the algorithm), of the cost of that part.

$$\begin{aligned}
 \text{cost}(S, T) &= \sum_{i=1}^{\ell} \sum_{x \in S_i} D(x, T)^2 \leq \sum_{i=1}^{\ell} \sum_{x \in S_i} (D(x, t_i(x)) + D(t_i(x), T))^2 \\
 &\leq 2 \sum_{i=1}^{\ell} \sum_{x \in S_i} D(x, t_i(x))^2 + 2 \sum_{i=1}^{\ell} \sum_{x \in S_i} D(t_i(x), T)^2 \\
 &= 2 \sum_{i=1}^{\ell} \text{cost}(S_i, T_i) + 2 \sum_{i=1}^{\ell} \sum_{j=1}^{|T_i|} |S_{ij}| D(t_{ij}, T)^2 \\
 &= 2 \sum_{i=1}^{\ell} \text{cost}(S_i, T_i) + 2 \text{cost}(S_w, T)
 \end{aligned}$$

<sup>11</sup>The dependence on  $d$  could probably be taken care of using dimension reduction techniques, which we will not elaborate on here.

<sup>12</sup>For the unweighted case, we can assume that  $w(x) = 1$  for all  $x$ .

The first inequality follows from applying the triangle inequality,  $D(x, T) \leq D(x, t_i(x)) + D(t_i(x), T)$ . The second inequality follows from applying  $(a + b)^2 \leq 2a^2 + 2b^2$ , to each term in the sum.  $\square$

First we will upper bound  $\sum_{i=1}^{\ell} \text{cost}(S_i, T_i)$ .

**Lemma A.2.**  $\sum_{i=1}^{\ell} \text{cost}(S_i, T_i) \leq b \cdot \text{cost}(S, T^*)$

*Proof.*

$$\sum_{i=1}^{\ell} \text{cost}(S_i, T_i) \leq \sum_{i=1}^{\ell} b \cdot \min_{T' \subset \mathbb{R}^d} \text{cost}(S_i, T') \leq \sum_{i=1}^{\ell} b \cdot \text{cost}(S_i, T^*) \leq b \cdot \text{cost}(S, T^*)$$

The first inequality is due to  $T_i$  being the result of  $A$  which provides a  $b$  approximation to the optimal cost, for each  $S_i$ .  $\square$

Now we will upper bound  $\text{cost}(S_w, T)$ .

**Lemma A.3.**  $\text{cost}(S_w, T) \leq 2b' \cdot (\sum_{i=1}^{\ell} \text{cost}(S_i, T_i) + \text{cost}(S, T^*))$

*Proof.* First,

$$\text{cost}(S_w, T) \leq b' \cdot \min_{T' \subset \mathbb{R}^d} \text{cost}(S_w, T') \leq b' \cdot \text{cost}(S_w, T^*),$$

where the first inequality is due to  $T$  being the result of  $A'$  which provides a  $b'$  approximation to the optimal cost, for input  $S_w$ . The second inequality follows from the optimality of the right hand side for  $S_w$ . We can now  $\text{cost}(S_w, T^*)$  bound as follows.

$$\begin{aligned} \text{cost}(S_w, T^*) &= \sum_{i=1}^{\ell} \sum_{j=1}^{|T_i|} |S_{ij}| D(t_{ij}, T^*)^2 \\ &\leq 2 \sum_{i=1}^{\ell} \sum_{j=1}^{|T_i|} \sum_{x \in S_{ij}} D(x, t_{ij})^2 + 2 \sum_{i=1}^{\ell} \sum_{j=1}^{|T_i|} \sum_{x \in S_{ij}} D(x, t^*(x))^2 \\ &= 2 \sum_{i=1}^{\ell} \sum_{x \in S_i} D(x, t_i(x))^2 + 2 \sum_{i=1}^{\ell} \sum_{x \in S_i} D(x, t^*(x))^2 \\ &= 2 \sum_{i=1}^{\ell} \text{cost}(S_i, T_i) + 2 \text{cost}(S, T^*) \end{aligned}$$

The first inequality uses the triangle inequality and then  $(a + b)^2 \leq 2a^2 + 2b^2$ , similar to the proof of Lemma A.1.  $\square$

To attain the Theorem, we simply apply substitutions from Lemmas A.2 and A.3 to the statement of Lemma A.1.  $\square$

### A.3 Additional experimental results

The experimental set-up is described in the paper. Here we report standard deviations on the experiments run.

| k  | BL                  | DC-1                | DC-2                |
|----|---------------------|---------------------|---------------------|
| 5  | $1.3302 \cdot 10^8$ | $2.3433 \cdot 10^8$ | $4.2539 \cdot 10^8$ |
| 10 | $2.9615 \cdot 10^8$ | $1.5782 \cdot 10^8$ | $1.8783 \cdot 10^8$ |
| 15 | $3.1203 \cdot 10^8$ | $8.6772 \cdot 10^7$ | $1.3998 \cdot 10^8$ |
| 20 | $3.6956 \cdot 10^8$ | $5.4427 \cdot 10^7$ | $1.0200 \cdot 10^8$ |
| 25 | $2.4563 \cdot 10^8$ | $4.7795 \cdot 10^3$ | $4.2328 \cdot 10^3$ |

  

| k  | BL                  | DC-1                | DC-2                |
|----|---------------------|---------------------|---------------------|
| 5  | $0.0000 \cdot 10^6$ | $1.5902 \cdot 10^6$ | $2.5717 \cdot 10^6$ |
| 10 | $1.2051 \cdot 10^6$ | $5.2143 \cdot 10^5$ | $5.3538 \cdot 10^5$ |
| 15 | $0.0736 \cdot 10^6$ | $3.0826 \cdot 10^5$ | $3.2327 \cdot 10^5$ |
| 20 | $0.2603 \cdot 10^6$ | $1.1590 \cdot 10^5$ | $2.2730 \cdot 10^5$ |
| 25 | $0.5821 \cdot 10^6$ | $1.2943 \cdot 10^5$ | $1.2939 \cdot 10^5$ |

  

| k  | BL                  | DC-1                | DC-2                |
|----|---------------------|---------------------|---------------------|
| 5  | $1.1687 \cdot 10^7$ | $4.5518 \cdot 10^7$ | $3.6388 \cdot 10^7$ |
| 10 | $0.0000 \cdot 10^7$ | $8.1261 \cdot 10^6$ | $1.1827 \cdot 10^7$ |
| 15 | $0.0373 \cdot 10^7$ | $3.3351 \cdot 10^6$ | $3.6615 \cdot 10^6$ |
| 20 | $0.2398 \cdot 10^7$ | $2.3456 \cdot 10^6$ | $2.0151 \cdot 10^6$ |
| 25 | $0.0631 \cdot 10^7$ | $1.1220 \cdot 10^6$ | $9.8168 \cdot 10^5$ |

Table 3: Standard deviations of the  $k$ -means cost (over 10 random restarts per algorithm): a) norm25 dataset, b) Cloud dataset, c) Spambase dataset.
